# Supplementary material for: Comprehensive High-Resolution Analysis of the Role of an Arabidopsis Gene Family in RNA Editing
Source: PLoS Genet. 2013 Jun 20;9(6):e1003584. doi: 10.1371/journal.pgen.1003584 (PMC3688494; doi:10.1371/journal.pgen.1003584)
Supplement: Figure S5 — Alignment of rps4 sequences in the area upstream to the C at position 299. The C at position 299 is indicated by an arrow and edited to a T in Arabidopsis thaliana, Brassica napus, and Citrullus lanatus. In the other species shown, C is substituted by a genomically-encoded T. Below the DNA sequences is given the amino acid sequence. (PDF) [file pgen.1003584.s008.pdf]

Figure 1 shows a 10x10 grid of nucleotide sequences. The sequences are arranged in 10 rows and 10 columns. The columns are labeled R, T, S, Y, I, P, F, L. The rows are labeled R, T, S, Y, I, P, F, L. The sequences are: Row 1: CGAACTTCATATATCCCTTTTCTA; Row 2: CGAACTTCATATATCCCTTTTCTA; Row 3: CGAACTTCATATATCCCTTTTCTA; Row 4: CGAACTTCATATATCCCTTTTCTA; Row 5: CGAACTTCATATATCCCTTTTCTA; Row 6: CGAACTTCATATATCCCTTTTCTA; Row 7: CGAACTTCATATATCCCTTTTCTA; Row 8: CGAACTTCATATATCCCTTTTCTA; Row 9: CGAACTTCATATATCCCTTTTCTA; Row 10: CGAACTTCATATATCCCTTTTCTA. A vertical arrow points to the 10th column (L) and a horizontal arrow points to the 10th row (L).
