# Supplementary material for: Comprehensive High-Resolution Analysis of the Role of an Arabidopsis Gene Family in RNA Editing
Source: PubMed Central journal article supplement (PMC3688494; doi:10.1371/journal.pgen.1003584), 2013-06-20

**A**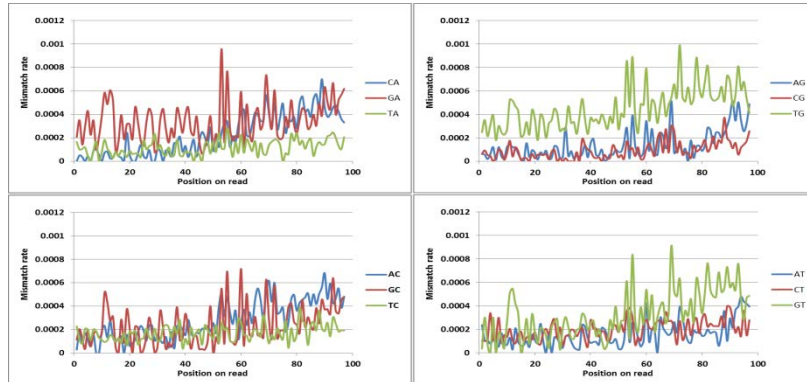**B**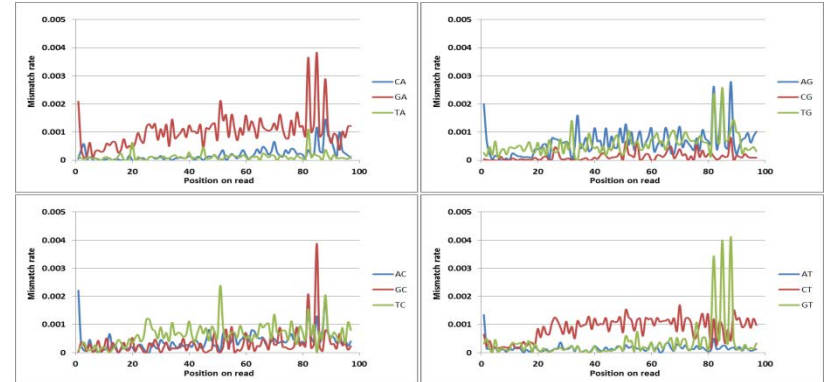**C**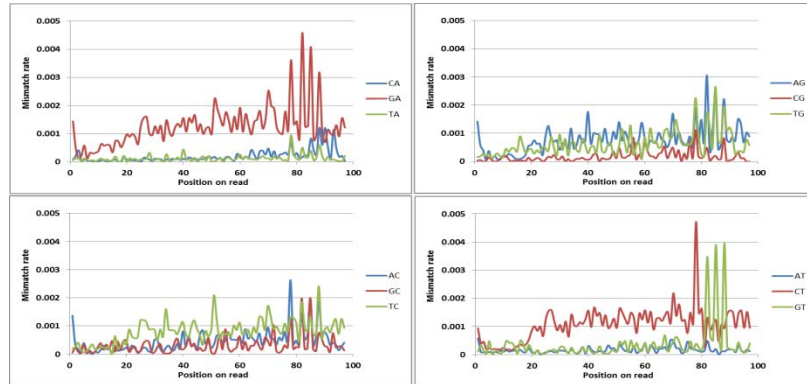**D**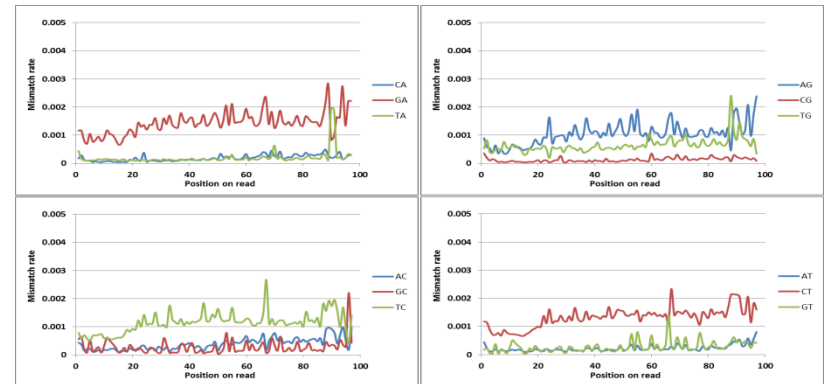

Supplement: pgen.1003584.s005.pdf [file pgen.1003584.s005.pdf]
