# Supplementary material for: Comprehensive High-Resolution Analysis of the Role of an Arabidopsis Gene Family in RNA Editing
Source: PubMed Central journal article supplement (PMC3688494; doi:10.1371/journal.pgen.1003584), 2013-06-20
Supplement: pgen.1003584.s006.pdf [file pgen.1003584.s006.pdf]

*ccmC*-655

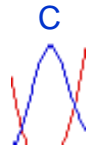

0.10

*cox2*-135

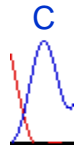

0.10

*nad2*-642

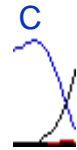

0.10

*nad2*-888

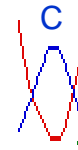

0.10

*rpl2*-292

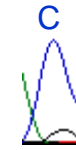

0.10
